# Supplementary material for: Prognostic Relevance of Inflammatory Cytokines Il-6 and TNF-Alpha in Patients with Breast Cancer: A Systematic Review and Meta-Analysis
Source: MDPI journal article supplement (doi:10.3390/curroncol32060344), 2025-06-11
Supplement: s1 [file File S2.pdf › File S2.pdf]

**File S2. LIST OF ARTICLES NOT INCLUDED**

| <b>Code</b> | <b>Study</b>                                                                                                                                                                                     | <b>Reason for exclusion</b>                          |
|-------------|--------------------------------------------------------------------------------------------------------------------------------------------------------------------------------------------------|------------------------------------------------------|
| 1           | Circulating Cytokines in Metastatic Breast Cancer Patients Select Different Prognostic Groups and Patients Who Might Benefit from Treatment beyond Progression                                   | Measuring cytokines with another method              |
| 2           | Tissue polypeptide antigen & interleukin-6: Are their serum levels a predictor for response to chemotherapy in breast cancer?                                                                    | Does not include survival or response to treatment   |
| 3           | Associations of circulating C-reactive protein and interleukin-6 with survival in women with and without cancer: Findings from the British Women's Heart and Health Study                        | Population with different types of cancer            |
| 4           | Association between serum cytokines and progression of breast cancer in Chinese population.                                                                                                      | Measuring cytokines with another method              |
| 5           | Inflammatory Cytokines and Comorbidity Development in Breast Cancer Survivors Versus Noncancer Controls: Evidence for Accelerated Aging?                                                         | No incluye supervivencia ni respuesta al tratamiento |
| 6           | Changes of cytokines and thyroid function in patients with recurrent breast cancer                                                                                                               | Result off topic                                     |
| 7           | TNF-alpha, IL-6 and their soluble receptor serum levels and secretion by neutrophils in cancer patients.                                                                                         | Population with different types of cancer            |
| 8           | Relationship satisfaction predicts lower stress and inflammation in breast cancer survivors: A longitudinal study of within-person and between-person effects.                                   | Does not include survival or response to treatment   |
| 9           | Elevated level of peripheral CD8(+) CD28(-) T lymphocytes are an independent predictor of progression-free survival in patients with metastatic breast cancer during the course of chemotherapy. | Result off topic                                     |
| 10          | Host genetic variants in the interleukin-6 promoter predict poor outcome in patients with estrogen receptor-positive, node-positive breast cancer.                                               | Study with an off-topic focus                        |
| 11          | Clinicopathological and prognostic significance of serum cytokine levels in breast cancer.                                                                                                       | Measuring cytokines by another method                |
| 12          | Validation of prognostic scores for survival in cancer patients beyond first-line therapy.                                                                                                       | Population with different types of cancer            |
