# Supplementary material for: Prognostic Relevance of Inflammatory Cytokines Il-6 and TNF-Alpha in Patients with Breast Cancer: A Systematic Review and Meta-Analysis
Source: MDPI journal article supplement (doi:10.3390/curroncol32060344), 2025-06-11
Supplement: s1 [file File S3.pdf › File S3.pdf]

**File S3. META- REGRESSION**

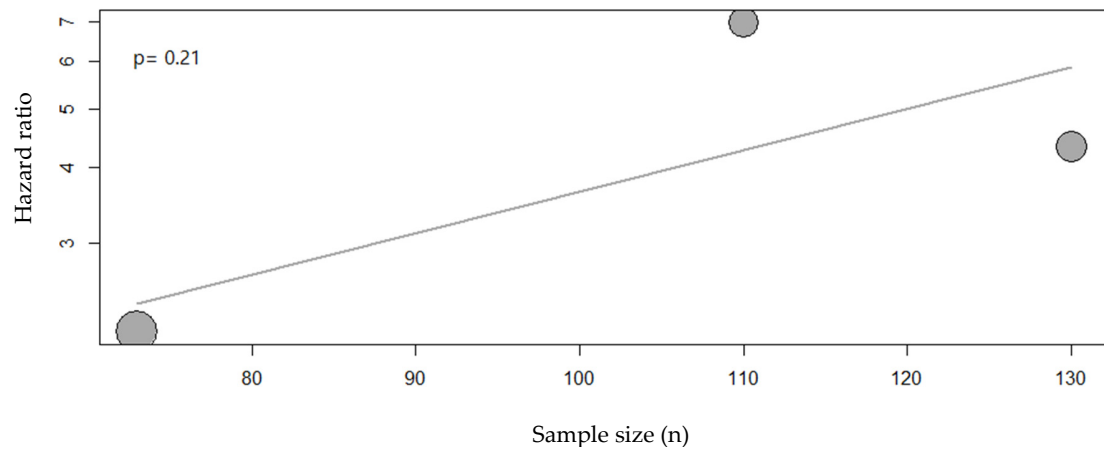

**File S3.** Absence of influence of sample size on heterogeneity according to meta-regression analysis in Overall Survival for IL-6.
