# Supplementary material for: Prognostic Relevance of Inflammatory Cytokines Il-6 and TNF-Alpha in Patients with Breast Cancer: A Systematic Review and Meta-Analysis
Source: MDPI journal article supplement (doi:10.3390/curroncol32060344), 2025-06-11
Supplement: s1 [file File S4.pdf › File S4.pdf]

**File S4 PUBLICATION BIAS**

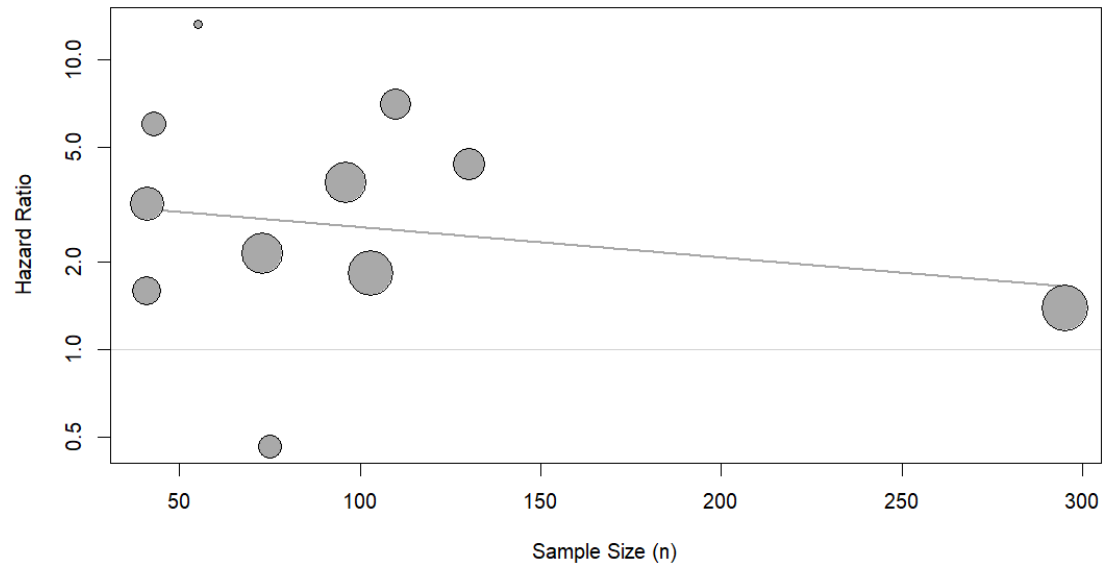

**File S4.** Publication bias is evident in the Funnel plot, showing asymmetry with a predominance on the right side (studies with a higher estimated risk).
